# Supplementary material for: Essential Oils: A Natural Weapon against Antibiotic-Resistant Bacteria Responsible for Nosocomial Infections
Source: PubMed Central journal article supplement (PMC8070240; doi:10.3390/antibiotics10040417), 2021-04-10
Supplement: antibiotics-10-00417-s001.pdf [file antibiotics-10-00417-s001.pdf]

Table S1. Synergistic activity resulted mixing EO/EO and Antibiotic/EO in VRE strains, by FIC Index calculation. MIC values are expressed in µg/mL.

| Strains    | Drug /EO | MIC alone | MIC combined | FICI          | Strains      | Drug /EO | MIC alone | MIC combined | FICI |
|------------|----------|-----------|--------------|---------------|--------------|----------|-----------|--------------|------|
| <b>A29</b> | EEO      | 8         | 2            | 0.26          | <b>B5</b>    | TTO      | 8         | 0.25         | 0.03 |
|            | VAN      | 256       | 2            |               |              | VAN      | 256       | 0.5          |      |
|            | TTO      | 1         | 0.25         | 0.25          |              | CEO      | 64        | 16           | 0.5  |
|            | VAN      | 256       | 1            |               |              | VAN      | 256       | 64           |      |
|            | AEO      | 256       | 64           | 0.5           | <b>VAN 3</b> | EEO      | 16        | 0.25         | 0.18 |
|            | VAN      | 256       | 64           |               |              | VAN      | 256       | 0.5          |      |
|            | LEO      | 64        | 16           | 0.5           |              | EEO      | 16        | 2            | 0.13 |
|            | VAN      | 256       | 64           |               |              | VAN      | 256       | 0.25         |      |
|            | CEO      | 32        | 8            | 0.5           |              | TTO      | 64        | 16           | 0.5  |
|            | VAN      | 256       | 64           |               |              | VAN      | 256       | 64           |      |
|            | AEO      | 256       | 64           | 0.5           |              | CEO      | 64        | 16           | 0.5  |
|            | CEO      | 32        | 8            |               |              | VAN      | 256       | 64           |      |
|            | EEO      | 8         | 2            | 0.5           |              | EEO      | 16        | 4            | 0.5  |
|            | TTO      | 1         | 0.25         |               |              | TTO      | 64        | 16           |      |
| <b>A30</b> | EEO      | 8         | 0.25         | 0.03          | <b>VAN 4</b> | CEO      | 128       | 32           | 0.5  |
|            | VAN      | 256       | 1            |               |              | VAN      | 256       | 64           |      |
|            | TTO      | 16        | 0.25         | 0.02          |              | TTO      | 8         | 2            | 0.5  |
|            | VAN      | 256       | 2            |               | CEO          | 128      | 32        |              |      |
|            | CEO      | 128       | 32           | 0.5           | <b>VAN 5</b> | TTO      | 32        | 8            | 0.5  |
|            | VAN      | 256       | 64           |               |              | VAN      | 16        | 4            |      |
|            |          |           |              | <b>VAN 19</b> | CEO          | 256      | 64        | 0.5          |      |
|            |          |           |              |               | VAN          | 8        | 2         |              |      |

Table S2. Synergistic activity resulted mixing EO/EO and Antibiotic/EO in MRSA strains, by FIC Index calculation. MIC values are expressed in µg/mL.

| Strains     | Drug /EO | MIC alone | MIC combined | FICI | Strains       | Drug /EO | MIC alone | MIC combined | FICI  |
|-------------|----------|-----------|--------------|------|---------------|----------|-----------|--------------|-------|
| <b>12A</b>  | LEO      | 32        | 8            | 0.5  | <b>MRSA</b>   | TTO      | 8         | 0.25         | 0.04  |
|             | OXA      | 256       | 64           |      |               | OXA      | 256       | 1            |       |
|             | EEO      | 64        | 16           | 0.5  |               | EEO      | 32        | 0.5          | 0.18  |
|             | OXA      | 256       | 64           |      |               | OXA      | 256       | 0.5          |       |
|             | TTO      | 32        | 8            | 0.5  |               | AEO      | 128       | 32           | 0.5   |
|             | OXA      | 256       | 64           |      |               | OXA      | 256       | 64           |       |
|             | EEO      | 64        | 16           | 0.5  |               | AEO      | 128       | 32           | 0.5   |
| <b>12 B</b> | TTO      | 32        | 8            |      | EEO           | 32       | 8         |              |       |
|             | LEO      | 256       | 64           | 0.5  | AEO           | 128      | 32        | 0.5          |       |
| <b>C1</b>   | OXA      | 256       | 64           |      | TTO           | 8        | 2         |              |       |
|             | EEO      | 8         | 0.25         | 0.04 | EEO           | 32       | 8         | 0.5          |       |
| <b>C3</b>   | OXA      | 256       | 2            |      | TTO           | 8        | 2         |              |       |
|             | EEO      | 8         | 2            | 0.5  | <b>MRSA 1</b> | TTO      | 32        | 8            | 0.5   |
|             | TTO      | 4         | 1            |      | OXA           | 4        | 1         |              |       |
|             | TTO      | 8         | 0.25         | 0.03 | TTO           | 32       | 8         | 0.5          |       |
| <b>C3</b>   | OXA      | 256       | 0.25         |      | CEO           | 512      | 128       |              |       |
|             | TTO      | 8         | 1            | 0.13 | <b>MRSA 2</b> | TTO      | 16        | 2            | 0.375 |
|             | OXA      | 256       | 0.5          |      | OXA           | 4        | 1         |              |       |
|             | EEO      | 32        | 8            | 0.5  | EEO           | 8        | 2         | 0.5          |       |
|             | OXA      | 256       | 64           |      | TTO           | 16       | 4         |              |       |
|             | EEO      | 32        | 8            | 0.5  | <b>O</b>      | TTO      | 8         | 0.25         | 0.03  |
|             | TTO      | 8         | 2            |      | OXA           | 256      | 0.5       |              |       |
|             |          |           |              | EEO  | 32            | 8        | 0.375     |              |       |
|             |          |           |              | TTO  | 8             | 1        |           |              |       |

Table S3. Synergistic activity resulted mixing EO/EO and Antibiotic/EO in ESBL-producing *E. coli* strains, by FIC Index calculation. MIC values are expressed in µg/mL.

| Strains | Drug /EO | MIC alone | MIC combined | FICI | Strains | Drug /EO | MIC alone | MIC combined | FICI |      |
|---------|----------|-----------|--------------|------|---------|----------|-----------|--------------|------|------|
| 34      | TTO      | 8         | 0.25         | 0.04 | 22CT    | LEO      | 256       | 64           | 0.5  |      |
|         | CTX      | 32        | 0.25         |      |         | CTX      | 64        | 16           |      |      |
|         | LEO      | 256       | 64           | 0.5  |         | CEO      | 64        | 16           | 0.5  |      |
|         | CTX      | 32        | 8            |      |         | CTX      | 64        | 16           |      |      |
|         | CEO      | 64        | 16           | 0.5  |         | LEO      | 256       | 64           | 0.5  |      |
|         | CTX      | 32        | 8            |      |         | CEO      | 64        | 16           |      |      |
|         | LEO      | 256       | 64           | 0.5  |         | TTO      | 4         | 1            | 0.5  |      |
|         | TTO      | 8         | 2            |      |         | CEO      | 64        | 16           |      |      |
|         | TTO      | 8         | 2            | 0.5  |         | 23CT     | TTO       | 2            | 0.25 | 0.18 |
|         | CEO      | 64        | 16           |      |         | CTX      | 64        | 4            |      |      |
| 39      | CEO      | 32        | 8            | 0.5  | 40CT    | TTO      | 4         | 0.25         | 0.07 |      |
|         | CTX      | 64        | 16           |      | CTX     | 32       | 0.25      |              |      |      |
| 22A     | TTO      | 8         | 2            | 0.27 | 23DT    | LEO      | 256       | 64           | 0.5  |      |
|         | CTX      | 64        | 1            |      |         | CTX      | 32        | 8            |      |      |
|         | LEO      | 512       | 128          | 0.5  |         | TTO      | 2         | 0.5          | 0.27 |      |
|         | CTX      | 64        | 16           |      |         | CTX      | 64        | 1            |      |      |
|         | CEO      | 32        | 8            | 0.5  |         | CEO      | 512       | 128          | 0.5  |      |
|         | CTX      | 64        | 16           |      |         | CTX      | 64        | 16           |      |      |
|         | LEO      | 512       | 128          | 0.5  |         | TTO      | 2         | 0.5          | 0.5  |      |
|         | TTO      | 8         | 2            |      |         | CEO      | 512       | 128          |      |      |
|         | TTO      | 8         | 2            | 0.5  |         | 31DT     | TTO       | 1            | 0.25 | 0.26 |
|         | CEO      | 32        | 8            |      |         | CTX      | 32        | 0.25         |      |      |
| 26A     | TTO      | 1         | 0.25         | 0.26 | LEO     | 256      | 64        | 0.5          |      |      |
|         | CTX      | 32        | 0.25         |      | CTX     | 32       | 8         |              |      |      |
| 28A     | TTO      | 4         | 0.25         | 0.07 | CEO     | 64       | 16        | 0.5          |      |      |
|         | CTX      | 32        | 0.25         |      | CTX     | 32       | 8         |              |      |      |
|         | LEO      | 256       | 64           | 0.5  | LEO     | 256      | 64        | 0.5          |      |      |
|         | CTX      | 32        | 8            |      | CEO     | 64       | 16        |              |      |      |
|         | EEO      | 64        | 16           | 0.5  | 45DT    | EEO      | 128       | 32           | 0.5  |      |
|         | CTX      | 32        | 8            |      | CTX     | 32       | 8         |              |      |      |
|         | CEO      | 64        | 16           | 0.5  | CEO     | 128      | 32        | 0.5          |      |      |
|         | CTX      | 32        | 8            |      | CTX     | 32       | 8         |              |      |      |
|         | LEO      | 256       | 64           | 0.5  | EEO     | 128      | 32        | 0.5          |      |      |
|         | CEO      | 64        | 16           |      | TTO     | 1        | 0.25      |              |      |      |
| 38A     | EEO      | 64        | 16           | 0.5  | 22F     | TTO      | 2         | 0.25         | 0.13 |      |
|         | TTO      | 4         | 1            |      | CTX     | 64       | 0.25      |              |      |      |
|         | TTO      | 4         | 1            | 0.5  | LEO     | 512      | 128       | 0.5          |      |      |
|         | CEO      | 64        | 16           |      | CTX     | 64       | 16        |              |      |      |
|         | TTO      | 4         | 0.25         | 0.07 | CEO     | 64       | 16        | 0.5          |      |      |
|         | CTX      | 32        | 0.25         |      | CTX     | 64       | 16        |              |      |      |
|         | LEO      | 256       | 64           | 0.5  | LIM     | 512      | 128       | 0.5          |      |      |
|         | CTX      | 32        | 8            |      | CEO     | 64       | 16        |              |      |      |
|         | CEO      | 128       | 32           | 0.5  | TTO     | 2        | 0.5       | 0.5          |      |      |
|         | CTX      | 32        | 8            |      | CEO     | 64       | 16        |              |      |      |
| 41A     | TTO      | 4         | 1            | 0.5  | 23F     | TTO      | 1         | 0.25         | 0.25 |      |
|         | CEO      | 128       | 32           |      | CTX     | 64       | 0.25      |              |      |      |
|         | TTO      | 4         | 0.25         | 0.07 | LEO     | 128      | 32        | 0.5          |      |      |
|         | CTX      | 32        | 0.25         |      | CTX     | 64       | 16        |              |      |      |
| 36AT    | LEO      | 256       | 64           | 0.5  | LEO     | 128      | 32        | 0.5          |      |      |
|         | CTX      | 32        | 8            |      | TTO     | 1        | 0.25      |              |      |      |
| 36AT    | LEO      | 512       | 128          | 0.5  | 31FT    | LEO      | 512       | 128          | 0.5  |      |

|             |     |     |      |      |              |     |     |      |      |
|-------------|-----|-----|------|------|--------------|-----|-----|------|------|
|             | CTX | 32  | 8    |      |              | CTX | 64  | 16   |      |
|             | LEO | 512 | 128  | 0.5  |              | EEO | 256 | 64   | 0.5  |
|             | TTO | 2   | 0.5  |      |              | CTX | 64  | 16   |      |
| <b>22BT</b> | LEO | 256 | 64   | 0.5  |              | EEO | 256 | 64   | 0.5  |
|             | CTX | 64  | 16   |      | <b>27G</b>   | TTO | 16  | 4    |      |
|             | EEO | 32  | 8    | 0.5  |              | TTO | 2   | 0.25 | 0.14 |
|             | CTX | 64  | 16   |      |              | CTX | 64  | 1    |      |
|             | TTO | 128 | 32   | 0.5  |              | LEO | 512 | 128  | 0.5  |
|             | CTX | 64  | 16   |      |              | CTX | 64  | 16   |      |
|             | CEO | 128 | 32   | 0.5  |              | CEO | 64  | 16   | 0.5  |
|             | CTX | 64  | 16   |      | <b>9 CI</b>  | CTX | 64  | 16   |      |
|             | LEO | 256 | 64   | 0.5  |              | TTO | 4   | 1    | 0.27 |
|             | EEO | 32  | 8    |      |              | CTX | 16  | 0.25 |      |
|             | LEO | 256 | 64   | 0.5  |              | LEO | 512 | 128  | 0.5  |
|             | TTO | 128 | 32   |      |              | CTX | 16  | 4    |      |
|             | LEO | 256 | 64   | 0.5  |              | CEO | 512 | 128  | 0.5  |
|             | CEO | 128 | 32   |      |              | CTX | 16  | 4    |      |
| <b>36BT</b> | TTO | 1   | 0.25 | 0.25 |              | LEO | 512 | 128  | 0.5  |
|             | CTX | 64  | 0.25 |      |              | TTO | 4   | 1    |      |
| <b>24C</b>  | TTO | 256 | 64   | 0.5  |              | TTO | 4   | 1    | 0.5  |
|             | CTX | 8   | 2    |      | <b>11 CI</b> | CEO | 512 | 128  |      |
|             |     |     |      |      |              | AEO | 512 | 128  | 0.5  |
|             |     |     |      |      |              | CTX | 32  | 8    |      |
